# Supplementary material
Source: PubMed Central journal article supplement (PMC5517247)
Supplement: flgastro-2011-100021ds1.pdf [file flgastro-2011-100021ds1.pdf]

## REQUEST FORM FOR THE USE OF AN UNLICENSED MEDICINE

|                                             |  |
|---------------------------------------------|--|
| <b>Name of Medicine</b>                     |  |
| <b>Form (i.e. tablets, injections etc.)</b> |  |
| <b>Strength</b>                             |  |
| <b>Proposed Indication(s)</b>               |  |

I understand that the above product is an unlicensed medicine. I also understand that I am professionally accountable when prescribing this medicine and may be called upon to justify my so doing.

I would like the following doctors, (if any), on my team to be able to prescribe this unlicensed medicine and have explained to them the fact that they are professionally accountable for each prescription. (Names must be specified)

---

---

---

---

|                            |  |
|----------------------------|--|
| <b>Name (please print)</b> |  |
| <b>Position</b>            |  |
| <b>Signature</b>           |  |
| <b>Date</b>                |  |

This request will be reviewed by the Trust's Drugs and Therapeutics Committee.
