# Supplementary material
Source: PubMed Central journal article supplement (PMC5517247)
Supplement: flgastro-2011-100021ds2.pdf [file flgastro-2011-100021ds2.pdf]

|                    |
|--------------------|
| Patient ID Sticker |
|--------------------|

**Training Checklist**

|    |                                                              | Yes / No |
|----|--------------------------------------------------------------|----------|
| 1  | Read and understood general information.                     |          |
| 2  | Consent form signed.                                         |          |
| 3  | Understands storage requirements for methotrexate.           |          |
| 4  | Knows when and where to get a prescription for methotrexate. |          |
| 5  | Understands how to collect and assemble equipment.           |          |
| 6  | Knows how to clean and prepare work area.                    |          |
| 7  | Knows correct hand washing technique.                        |          |
| 8  | Uses gloves.                                                 |          |
| 9  | Shows safe handling of needles.                              |          |
| 10 | Checks drug expiry date and opens syringe packet safely.     |          |
| 11 | Safe subcutaneous administration of methotrexate.            |          |
| 12 | Tidying up after administration.                             |          |
| 13 | Safe disposal of waste.                                      |          |
| 14 | Knows how to deal with a spillage.                           |          |

**Patient's Signature** \_\_\_\_\_

**Printed Name** \_\_\_\_\_

**Date** \_\_\_\_\_

-----

**Trainer's Signature** \_\_\_\_\_

**Printed Name** \_\_\_\_\_

**Date** \_\_\_\_\_
